# Supplementary material
Source: MDPI journal article supplement (https://www.mdpi.com/2073-4344/11/7/784)
Supplement: s1 [file s1]

## Supplementary materials

### Criteria for engineering cutinases: bioinformatics analysis of catalophores

Sara Fortuna<sup>1</sup>, Marco Cespugli<sup>1</sup>, Anamaria Todea<sup>1</sup>, Alessandro Pellis<sup>2</sup>, Lucia Gardossi<sup>1\*</sup>

<sup>1</sup>Department of Chemical and Pharmaceutical Sciences, University of Trieste, Via L. Giorgieri 1, Trieste, 34127, Italy

<sup>2</sup>University of Natural Resources and Life Sciences Vienna, Department of Agrobiotechnology, Institute of Environmental Biotechnology, Konrad Lorenz Strasse 20, 3430, Tulln an der Donau, Austria

\*Correspondence: [s.fortuna@units.it](mailto:s.fortuna@units.it) (S.F.); [gardossi@units.it](mailto:gardossi@units.it) (L.G.).

**Table S1:** PDB codes, sources and substrates of the serine-hydrolase used as dataset in the study.

| Enzyme class | PDB code | Source                               | Substrate                        |
|--------------|----------|--------------------------------------|----------------------------------|
| Cutinases    | 1AGY     | <i>Fusarium solani</i>               | cutin, short esters, PET, PBS    |
|              | 3DCN     | <i>Glomerella cingulata</i>          | cutin, triacylglycerol           |
|              | 3QPD     | <i>Aspergillus oryzae</i>            | cutin, long chain esters         |
|              | 3WYN     | <i>Thermobifida alba</i>             | cutin, PET, PBS, PLA             |
|              | 4CG1     | <i>Thermobifida fusca</i>            | cutin, PET                       |
|              | 4OYY     | <i>Humicola insolens</i>             | cutin, PET, PBS, PLA, PBAT       |
|              | 4PSE     | <i>Trichoderma reesei</i>            | cutin, triacylglycerol           |
|              | 4WFI     | <i>Saccharomonospora viridis</i>     | short-chain triacylglycerol, PET |
|              | Thc_Cut1 | <i>Thermobifida cellulosilytica</i>  | PET, PEF, PBAT                   |
| Lipases      | 1CRL     | <i>Candida rugosa</i>                | triacylglycerol                  |
|              | 1DTE     | <i>Humicola lanuginosa</i>           | triacylglycerol                  |
|              | 1ETH     | <i>Sus scrofa</i>                    | triacylglycerol                  |
|              | 1EX9     | <i>Pseudomonas aeruginosa</i>        | triacylglycerol                  |
|              | 1GPL     | <i>Cavia porcellus</i>               | triacylglycerol                  |
|              | 1K8Q     | <i>Canis lupus familiaris</i>        | triacylglycerol                  |
|              | 1LPB     | <i>Homo sapiens</i>                  | triacylglycerol                  |
|              | 1TCA     | <i>Candida antarctica</i>            | triacylglycerol                  |
|              | 2FX5     | <i>Pseudomonas mendocina</i>         | triacylglycerol                  |
|              | 2NW6     | <i>Burkholderia cepacia</i>          | triacylglycerol                  |
|              | 2W22     | <i>Geobacillus thermocatenulatus</i> | triacylglycerol                  |
| Esterases    | 1AUO     | <i>Pseudomonas fluorescens</i>       | broad specificity                |

|           |      |                                     |                                 |
|-----------|------|-------------------------------------|---------------------------------|
|           | 1BS9 | <i>Penicillium purpurogenum</i>     | xylanes acetates                |
|           | 1C7J | <i>Bacillus subtilis</i>            | p-nitrobenzyl esters            |
|           | 1CLE | <i>Candida cylindracea</i>          | cholesterol esters              |
|           | 1JU3 | <i>Rhodococcus sp.</i>              | cocaine                         |
|           | 1QOZ | <i>Tricoderma reesei</i>            | xylanes acetates                |
|           | 1USW | <i>Aspergillus niger</i>            | feroloyl-polysaccharide         |
|           | 2ACE | <i>Torpedo californica</i>          | acetylcholine                   |
|           | 2H7C | <i>Homo sapiens</i>                 | CoA, palmitate and taurocholate |
|           | 2WFL | <i>Rauvolfia serpentine</i>         | polyneuridine aldehyde          |
|           | 3KVN | <i>Pseudomonas aeruginosa</i>       | rhamnolipids                    |
| Proteases | 1GVK | <i>Sus scrofa</i>                   | Ala- -Xaa                       |
|           | 1NPM | <i>Mus musculus</i>                 | Lys/Arg- -Xaa                   |
|           | 1PPB | <i>Homo sapiens</i>                 | Arg- -Gly fibrinogen            |
|           | 1QFM | <i>Sus scrofa</i>                   | Pro- -Xaa (~30aa)               |
|           | 1TAW | <i>Bos Taurus</i>                   | Lys/Arg- -Xaa                   |
|           | 1TM1 | <i>Bacillus amyloliquefaciens</i>   | uncharged P1                    |
|           | 1YU6 | <i>Bacillus licheniformis</i>       | uncharged P1                    |
|           | 2XE4 | <i>Leshmania major</i>              | oligopeptides                   |
|           | 3F7O | <i>Peacelomyces lilacinus</i>       | peptides                        |
| Amidases  | 1AZW | <i>Xantomonas campestris</i>        | NH-Pro- -Xaa                    |
|           | 1GM9 | <i>Escherichia coli</i>             | penicillin                      |
|           | 1HL7 | <i>Microbacterium sp.</i>           | $\gamma$ -lactam                |
|           | 1M21 | <i>Stenotrophomonas maltophilia</i> | C terminal amide                |
|           | 1MPL | <i>Streptomyces sp.</i>             | L-Lys-D-Ala- -D-Ala             |
|           | 1MU0 | <i>Thermoplasma acidophilum</i>     | NH-Pro- -Xaa                    |
|           | 1QTR | <i>Serratia marcescens</i>          | NH-Pro- -Xaa                    |
|           | 3A2P | <i>Arthrobacter sp.</i>             | 6-amino exanoate dimer          |
|           | 3K3W | <i>Alcaligenes faecalis</i>         | penicillin                      |
|           | 3K84 | <i>Rattus norvegicus</i>            | fatty acid amide                |
|           | 3NWO | <i>Mycobacterium smegmatis</i>      | NH-Pro- -Xaa                    |

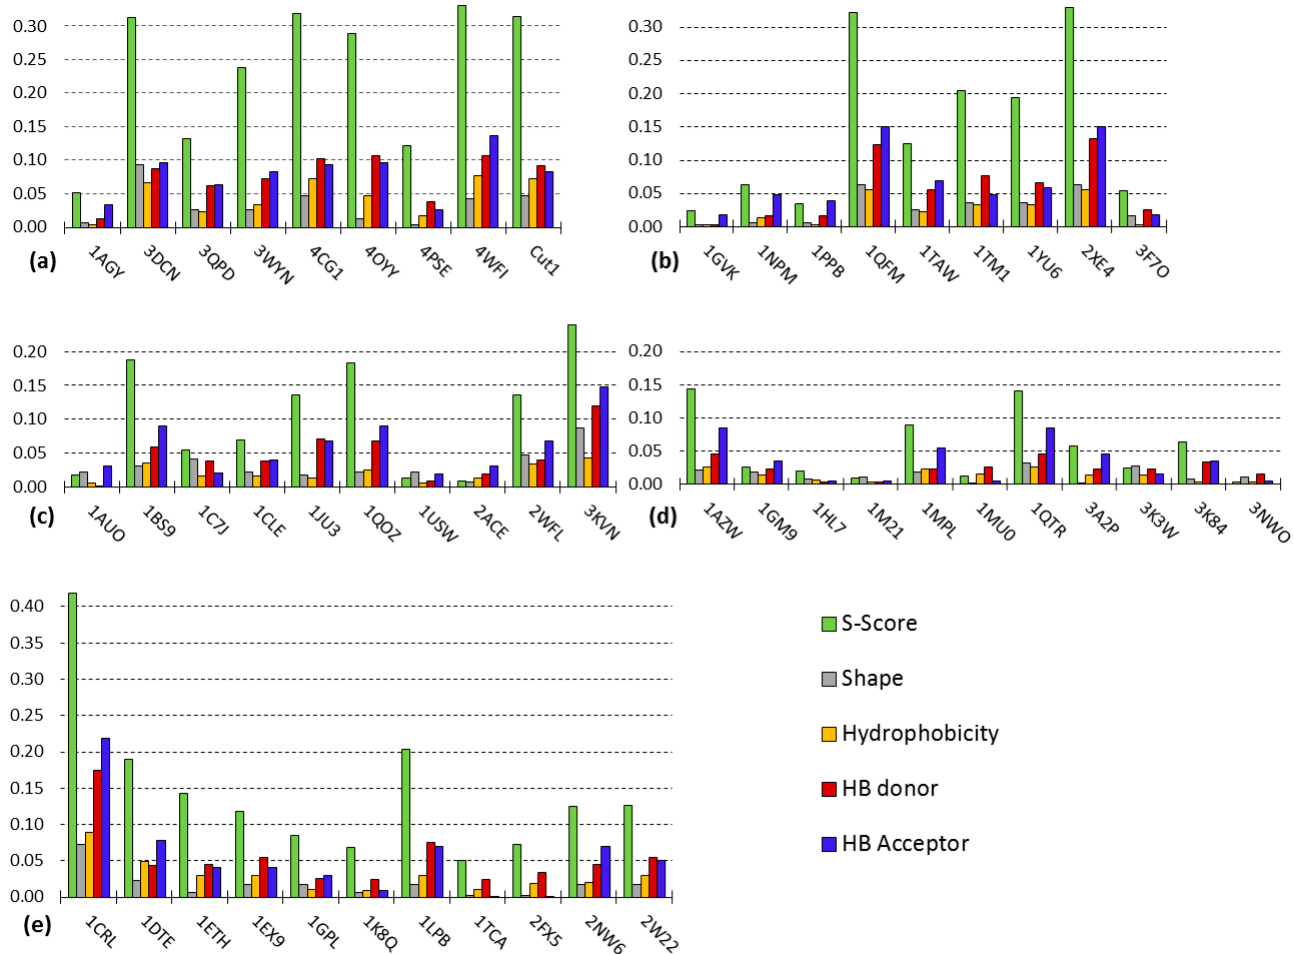

**Figure S1.** S-scores represented by deviation from the average value, low values mean that the structure is well fitted within the dataset. (a) cutinases, (b) proteases, (c) esterases, (d) amidases, (e) lipases.

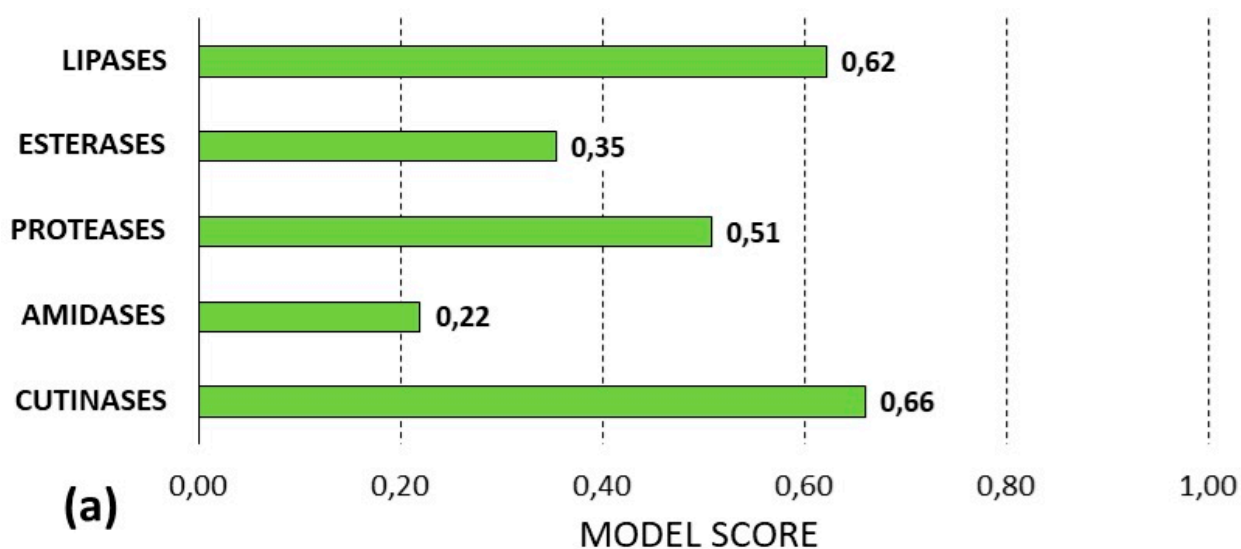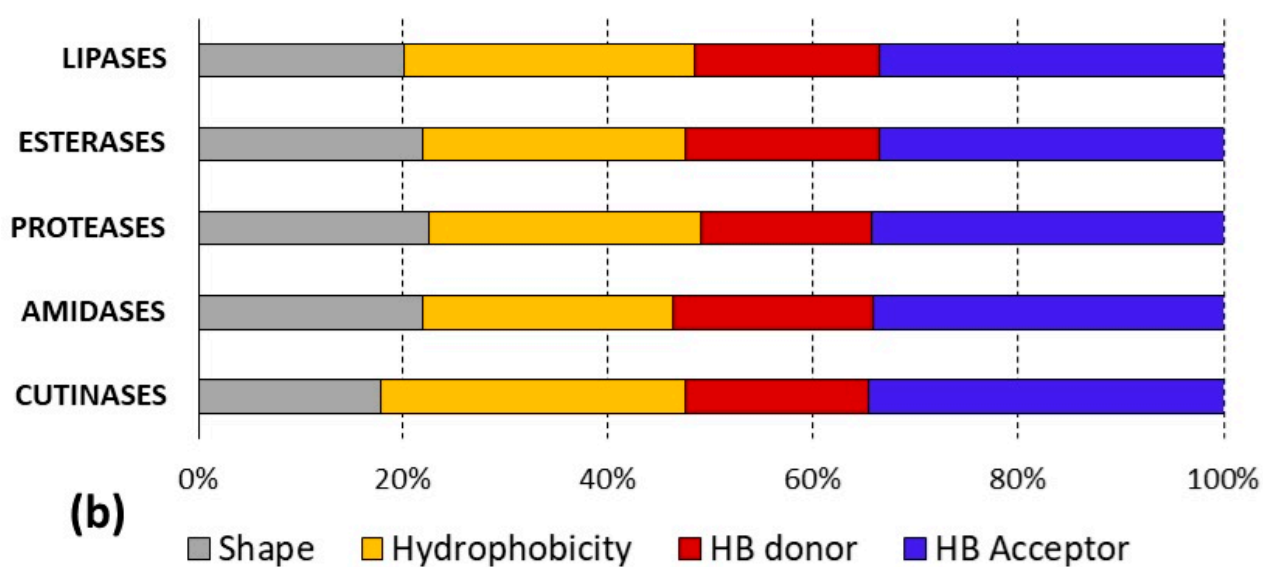

**Figure S2.** Model scores calculated for the different sub-classes of hydrolases: (a) average score for each serine hydrolase sub-class, and (b) component contributions to the average score of each serine hydrolase sub-class. Color code: shape (gray), DRY probe (hydrophobicity, yellow), O probe (H-Bond donors, red), and N1 probe (H-Bond acceptors, blue).

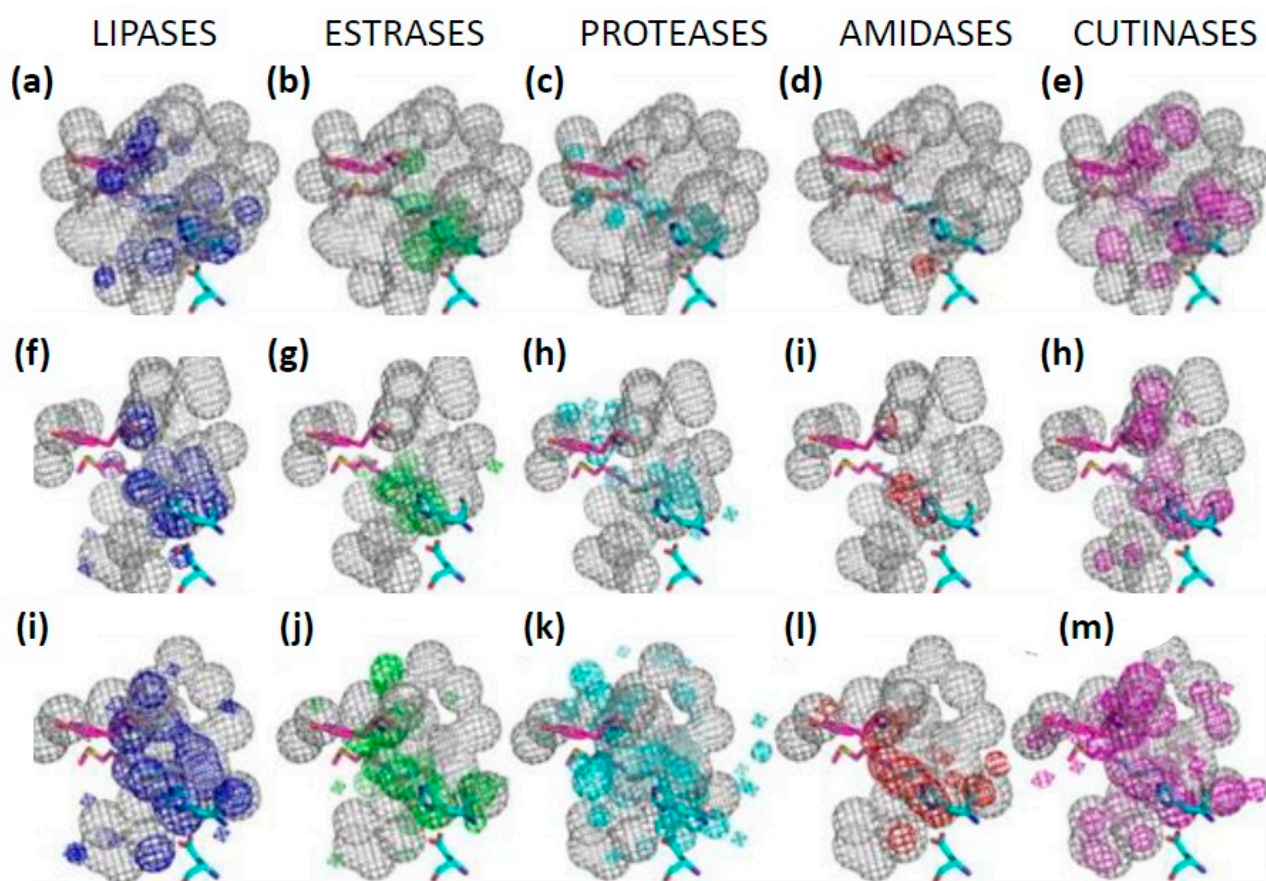

**Figure S3.** Superposition of the Thc\_cut1 MIFs (gray) on the calculated catalophores of each serine hydrolase sub-class. Mapping calculated from: (a-e) DRY probe (hydrophobicity), (f-h) O probe (H-Bond donors), and (i-m) N1 probe (H-Bond acceptors). For from left to right: lipases (blue), estrases (green), proteases (cyan), amidases (red), cutinases (magenta). The superimposition took as spatial reference the residues comprising the oxanion hole of the structure of Thc\_cut1 (Tyr61 and Met132, highlighted in magenta).

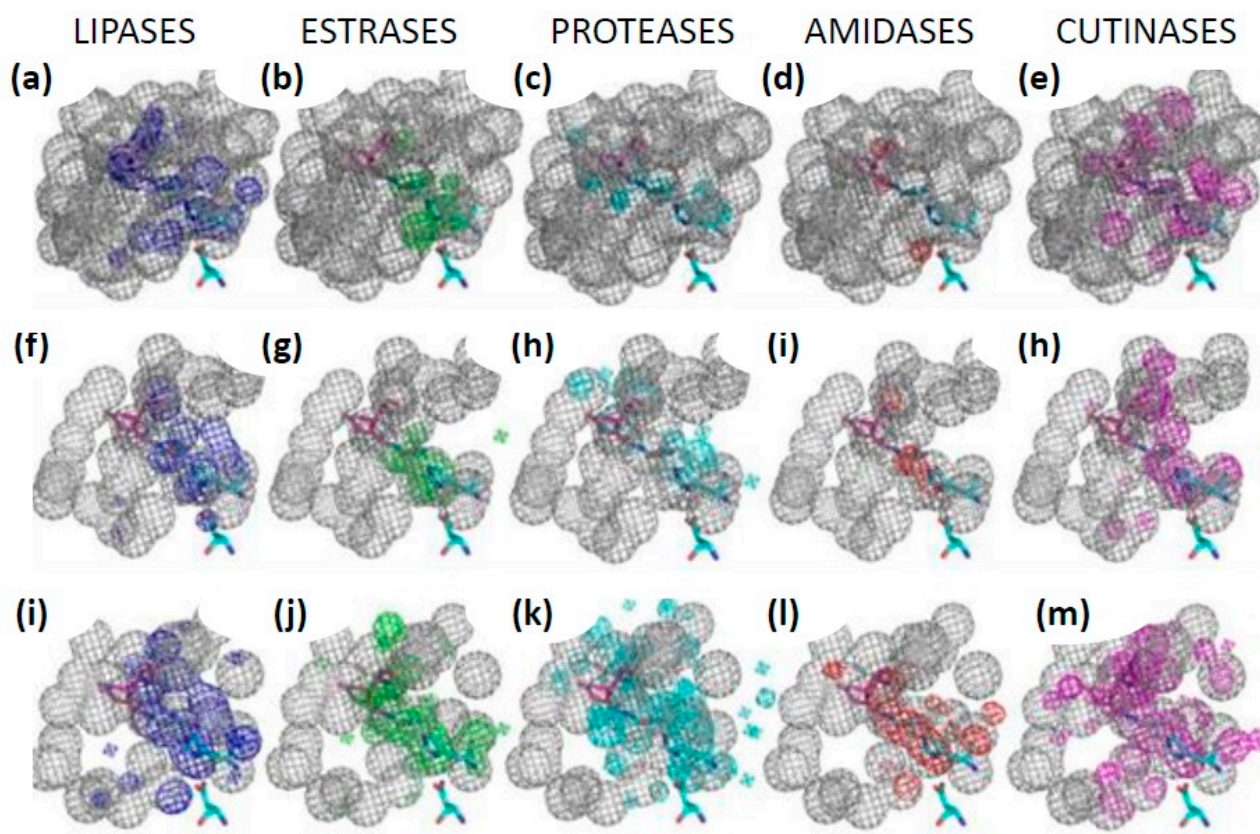

**Figure S4** Superposition of the CaLB MIFs (gray) on the calculated catalophores of each serine hydrolase subclass. Mapping calculated from: (a-e) DRY probe (hydrophobicity), (f-h) O probe (H-Bond donors), and (i-m) N1 probe (H-Bond acceptors). For from left to right: lipases (blue), estrases (green), proteases (cyan), amidases (red), cutinases (magenta). The superimposition took as spatial reference the residues comprising the oxyanion hole of the structure of CaLB (Thr40 and Gln106, highlighted in magenta).



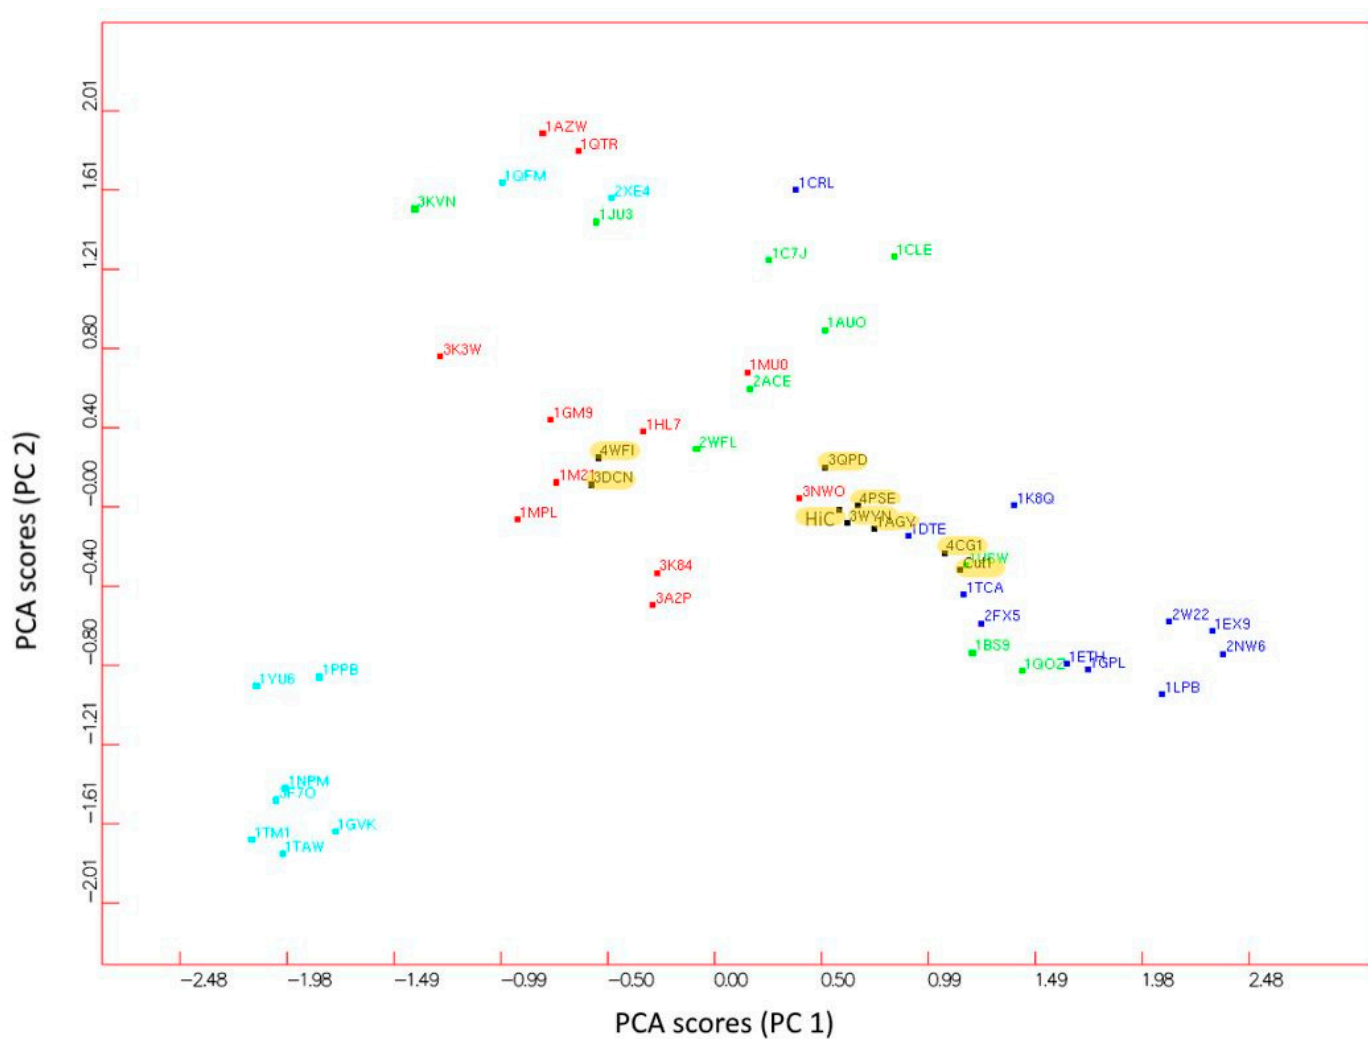

**Figure S5.** UPCA Model, Serine-hydrolases with cutinase projection: global score. Color code: lipases (blue), esterases (green), proteases (cyan), amidases (red), cutinases (yellow). Individual panels can be found as full page images in ESI.

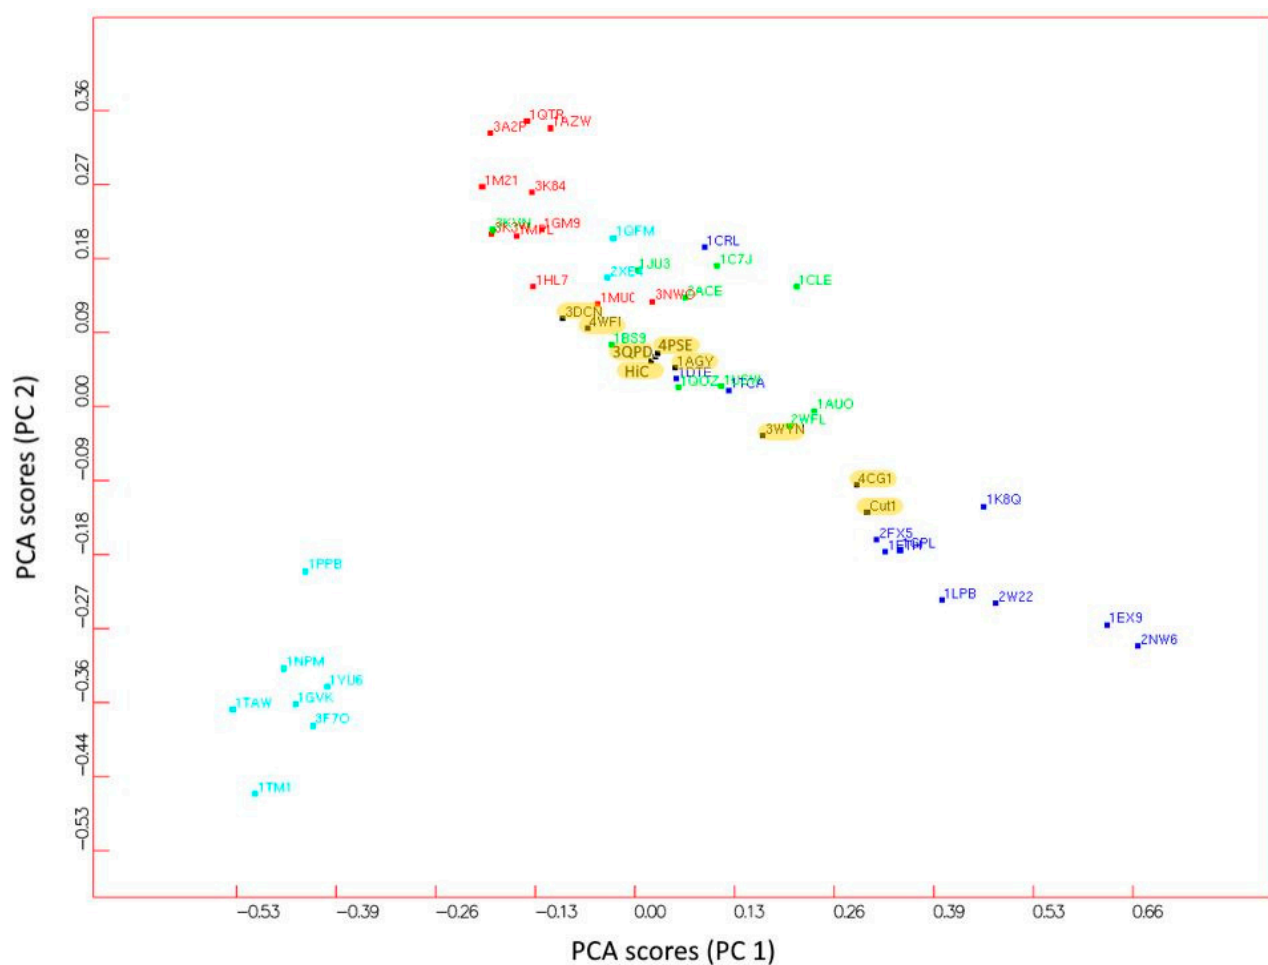

**Figure S6** UPCA Model, Serine-hydrolases with cutinase projection: O-probe score. Color code: lipases (blue), esterases (green), proteases (cyan), amidases (red), cutinases (yellow). Individual panels can be found as full page images in Figures S6-S9.



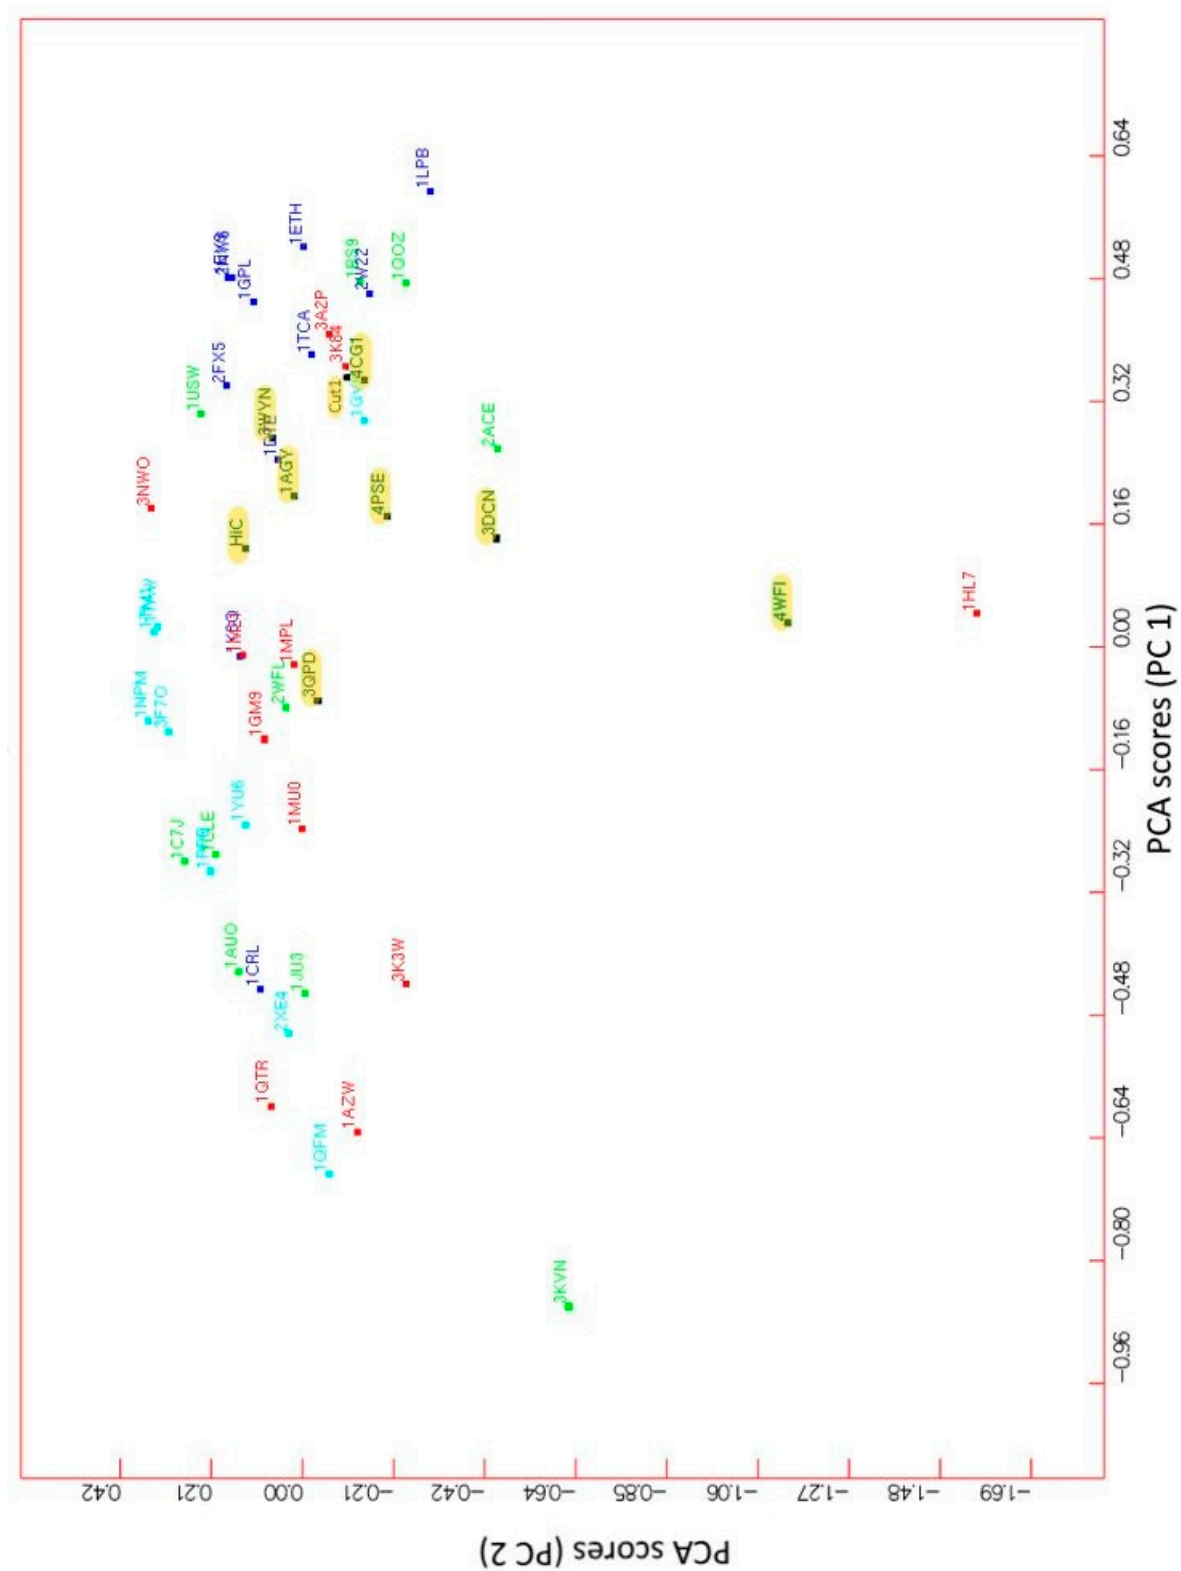

**Figure S7.** UPCA Model, Serine-hydrolases with cutinase projection: shape probe. Color code: lipases (blue), esterases (green), proteases (cyan), amidases (red), cutinases (yellow).

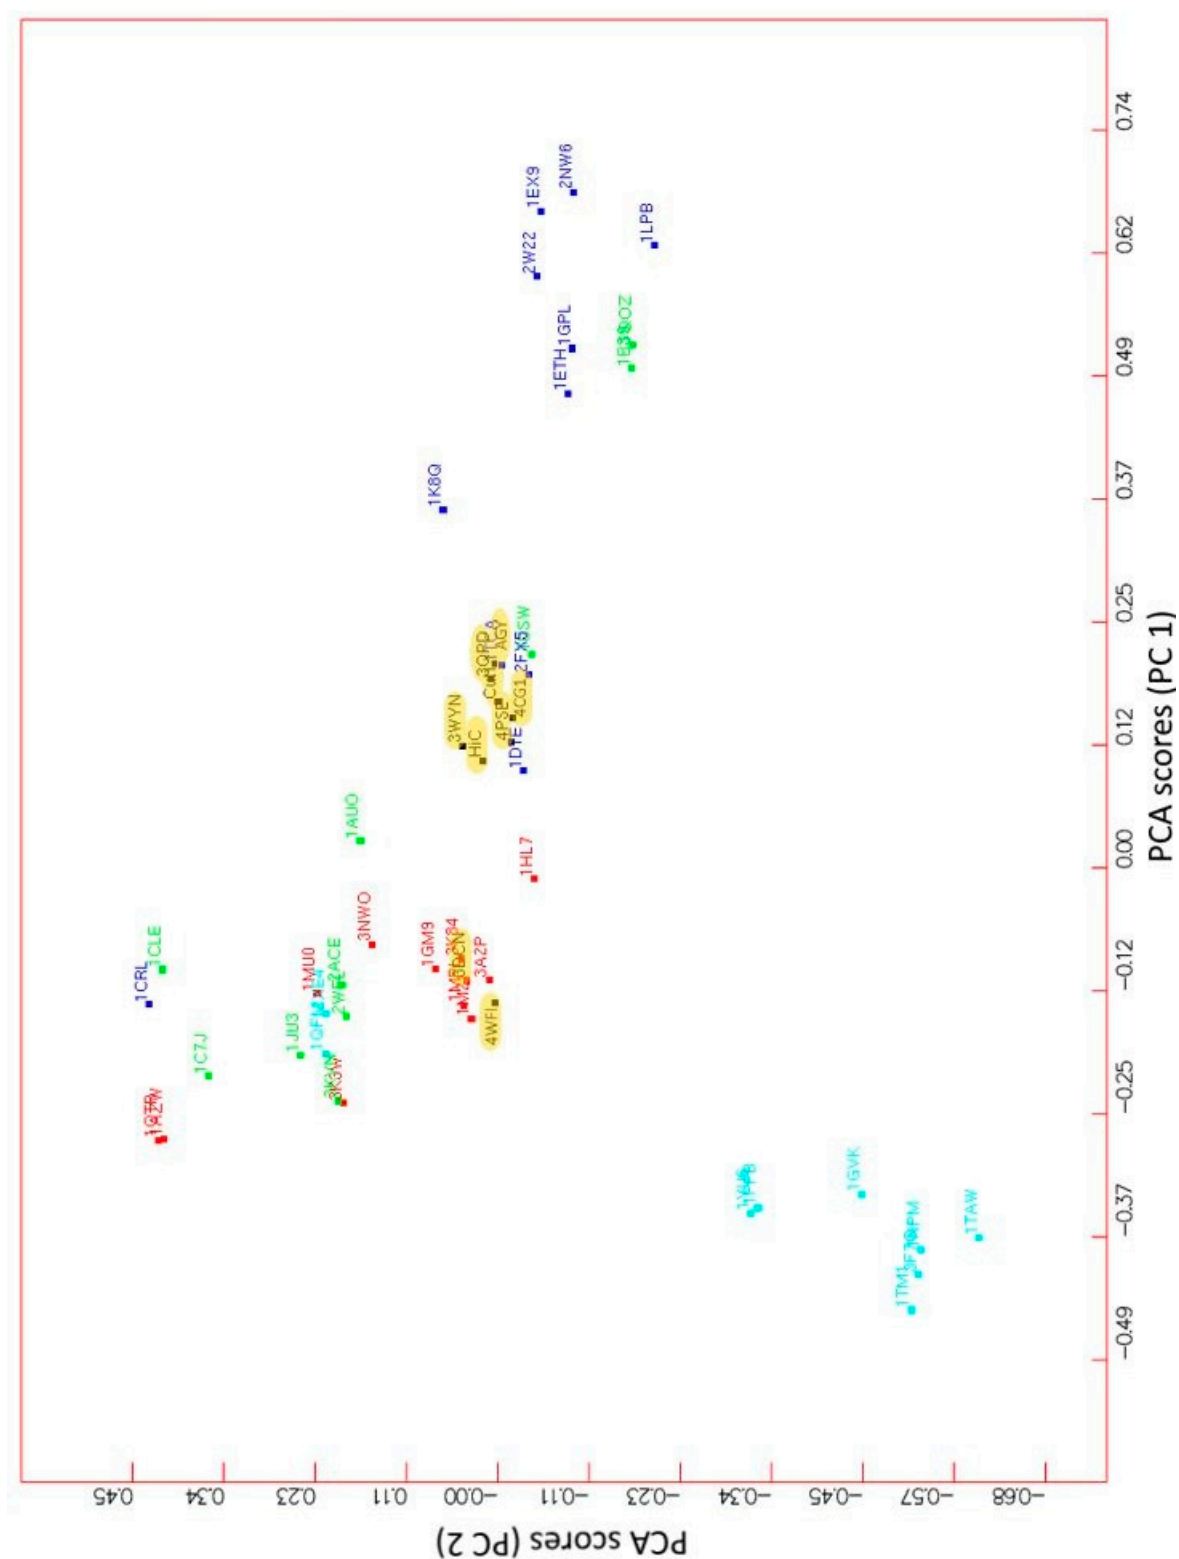

**Figure S8.** UPCA Model, Serine-hydrolases with cutinase projection: hydrophobicity probe. Color code: lipases (blue), esterases (green), proteases (cyan), amidases (red), cutinases (yellow).

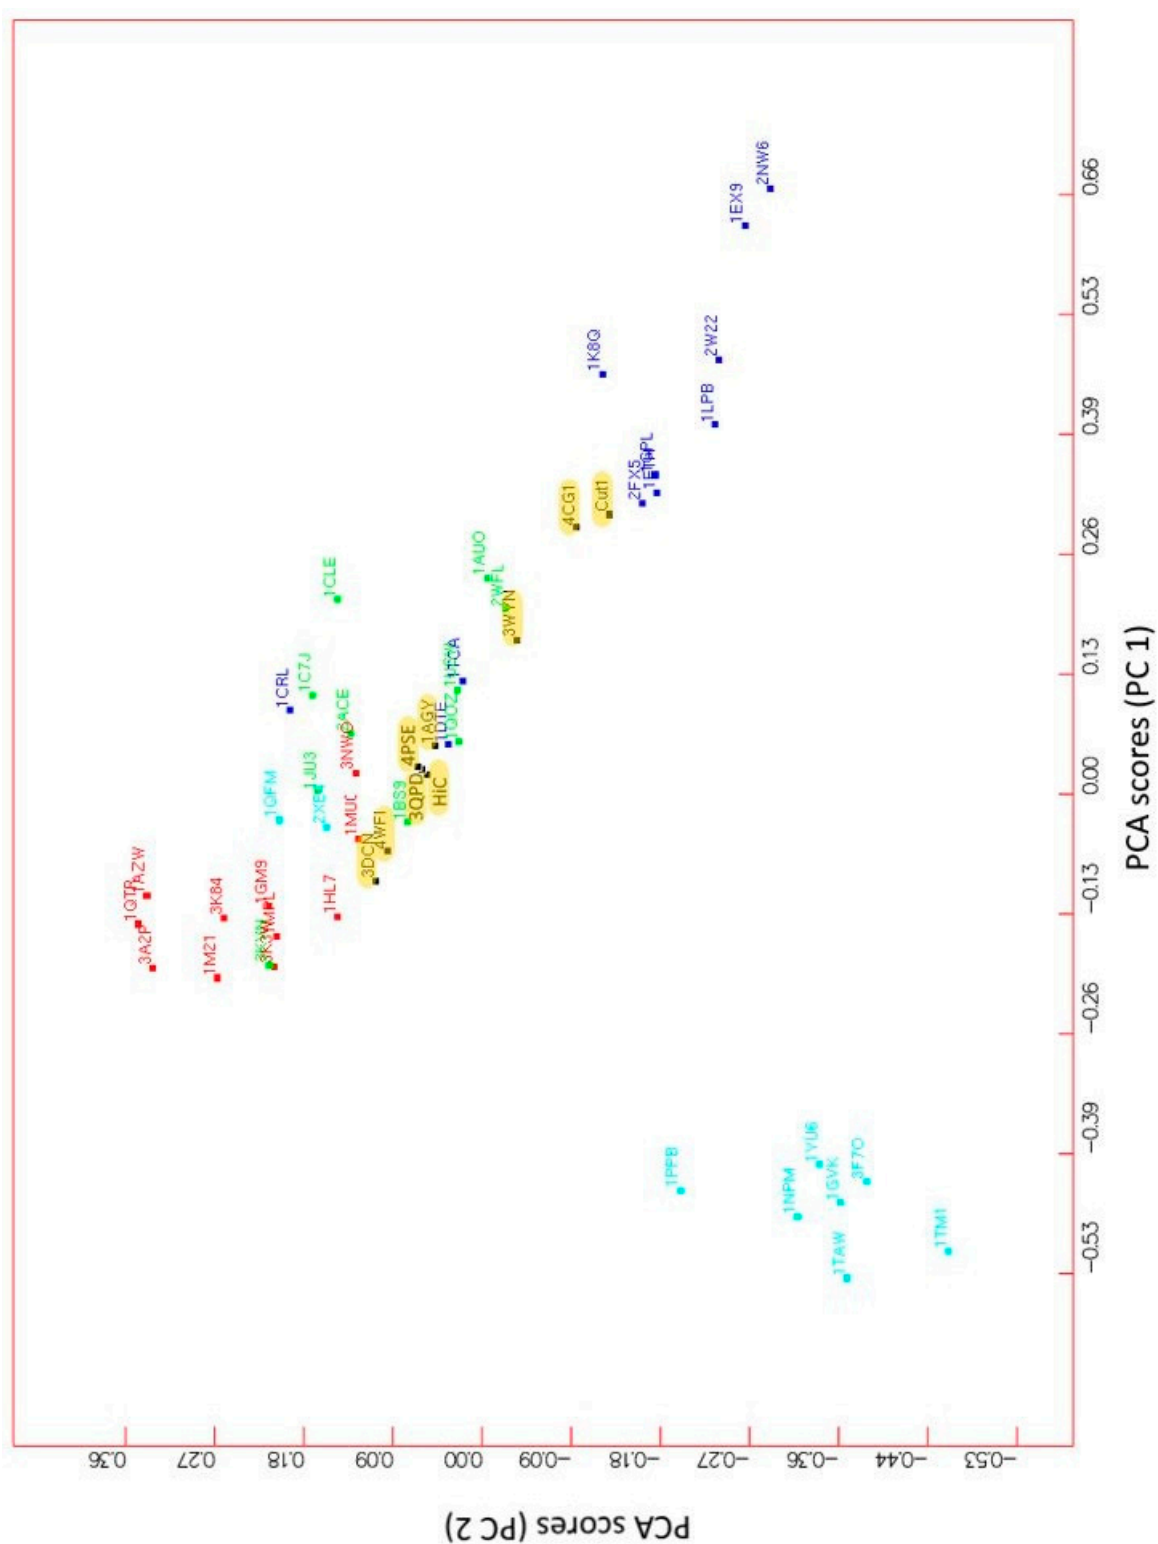

**Figure S9.** UPCA Model, Serine-hydrolases with cutinase projection: H-bond acceptors probe. Color code: lipases (blue), esterases (green), proteases (cyan), amidases (red), cutinases (yellow).

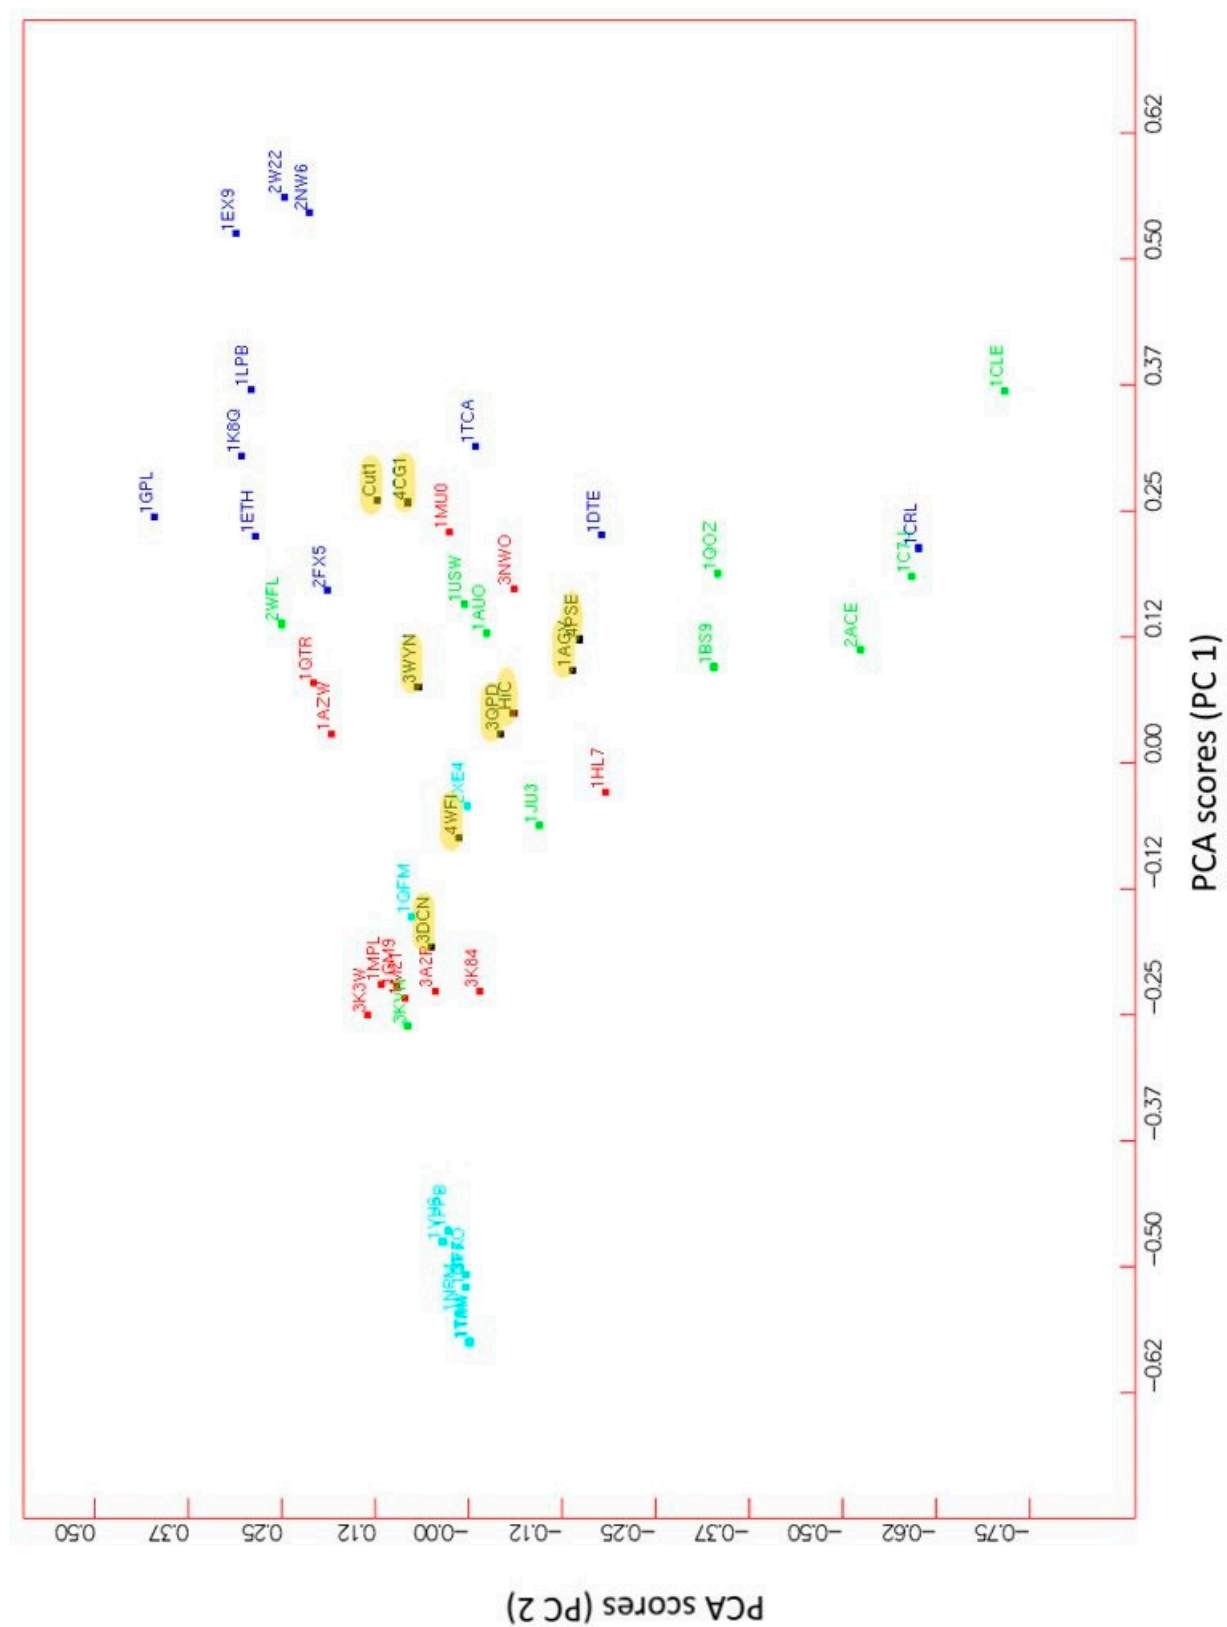

**Figure S10.** UPCA Model, Serine-hydrolases with cutinase projection: H-bond donors probe. Color code: lipases (blue), esterases (green), proteases (cyan), amidases (red), cutinases (yellow).
